# Supplementary material for: Hyperkalemia Recurrence Following Medical Nutrition Therapy in Patients with Stage 3–4 Chronic Kidney Disease: The REVOLUTIONIZE I Real-World Study
Source: PubMed Central journal article supplement — Adv Ther. 2024 Apr 30;41(6):2381–98. doi: 10.1007/s12325-024-02835-8 (PMC11133091; doi:10.1007/s12325-024-02835-8), 2024-04-30
Supplement: 12325_2024_2835_MOESM1_ESM.pdf [file 12325_2024_2835_MOESM1_ESM.pdf]

## **SUPPLEMENTARY MATERIAL**

### **Hyperkalemia Recurrence Following Medical Nutrition Therapy in Patients with Stage 3–4 Chronic Kidney Disease: The REVOLUTIONIZE I Real- World Study**

Christopher G. Rowan<sup>1</sup>, Abiy Agiro<sup>2</sup>, K. Arnold Chan<sup>3</sup>, Ellen Colman<sup>4</sup>, Katie White<sup>3</sup>, Pooja Desai<sup>4</sup>, Jamie P. Dwyer<sup>5</sup>

<sup>1</sup>Pharmacoepidemiology, COHRDATA, INC, San Clemente, CA, United States;

<sup>2</sup>US Evidence, US Medical Affairs, AstraZeneca, Wilmington, DE, United States;

<sup>3</sup>TriNetX, LLC, Cambridge, MA, United States;

<sup>4</sup>US Renal, US Medical Affairs, AstraZeneca, Wilmington, DE, United States;

<sup>5</sup>Department of Internal Medicine, University of Utah, Salt Lake City, UT, United States.

#### **Corresponding Author:**

Christopher G. Rowan. Pharmacoepidemiology, COHRDATA, INC, 4030 Calle Marlena, San Clemente, CA 92672, United States; email: crowan@cohrdata.com

### Supplementary Table S1 Patient disposition

| Step                                                | Study cohort                                                                                                  | N           |
|-----------------------------------------------------|---------------------------------------------------------------------------------------------------------------|-------------|
| 0                                                   | Total number of patients in the TriNetX Dataworks USA Network                                                 | 90,924,420  |
| 1                                                   | MNT during the study period (01 January 2019 to 31 October 2022)                                              | 399,254     |
| 2                                                   | Age $\geq$ 18 years at the time of MNT                                                                        | 289,451     |
| 3                                                   | Serum $K^+$ $>$ 5.0 mmol/L within 30 days prior to MNT                                                        | 24,357      |
| 4                                                   | HK diagnosis within 2 years pre-index <sup>a</sup>                                                            | 10,584      |
| 5                                                   | CKD diagnosis within 2 years pre-index <sup>a</sup>                                                           | 6473        |
| 6                                                   | CKD stage 3–4 (eGFR $\geq$ 15 and $<$ 60 mL/min/1.73 m <sup>2</sup> ) within 12 months pre-index <sup>a</sup> | 2870        |
| 7                                                   | $\geq$ 1 healthcare encounter between 12–24 months pre-index <sup>a</sup>                                     | 2246        |
| 8                                                   | No outpatient record for a potassium binder within 182 days pre-index <sup>a</sup>                            | 2048        |
| <b>Total number of patients in the study cohort</b> |                                                                                                               | <b>2048</b> |

<sup>a</sup>The index date is the date of first MNT plus 7 days.

CKD chronic kidney disease, eGFR estimated glomerular filtration rate, HK hyperkalemia,  $K^+$  potassium, MNT medical nutrition therapy

## Supplementary Table S2 Patient attrition

|                                                                                         | Total study cohort (N = 2048) |
|-----------------------------------------------------------------------------------------|-------------------------------|
| Time to first censoring event, days                                                     |                               |
| Mean $\pm$ SD                                                                           | 148.3 (59.9)                  |
| Median (IQR)                                                                            | 180 (159–180)                 |
| Patients censored at each post-index <sup>a</sup> analysis interval (cumulative), n (%) |                               |
| 1 month                                                                                 | 258 (12.6)                    |
| 2 months                                                                                | 321 (15.7)                    |
| 3 months                                                                                | 377 (18.4)                    |
| 4 months                                                                                | 425 (20.8)                    |
| 5 months                                                                                | 488 (23.8)                    |
| 6 months                                                                                | 545 (26.6)                    |
| Reason for censoring, n (%)                                                             |                               |
| Index period end date (October 31, 2022)                                                | 116 (5.7)                     |
| Death                                                                                   | 287 (14.0)                    |
| Outpatient K <sup>+</sup> binder use                                                    | 142 (6.9)                     |
| End of 6-month follow-up period                                                         | 1503 (73.4)                   |
| Total                                                                                   | 2048 (100.0)                  |

<sup>a</sup>The index date is the date of first MNT plus 7 days.

*IQR* interquartile range, *K<sup>+</sup>* potassium, *MNT* medical nutrition therapy, *SD* standard deviation

**Supplementary Table S3** Baseline patient demographics, clinical characteristics, treatments, and healthcare resource utilization in additional patient subgroups

|                                            | Patient subgroup           |                           |                                        |                                     |                               |                                                     |
|--------------------------------------------|----------------------------|---------------------------|----------------------------------------|-------------------------------------|-------------------------------|-----------------------------------------------------|
|                                            | Hypertension<br>(n = 1968) | CKD stage 3a<br>(n = 532) | HF and stage<br>3a/3b CKD<br>(n = 665) | HF and stage 3a<br>CKD<br>(n = 294) | Type 2 diabetes<br>(n = 1334) | Moderate-to-<br>severe HK <sup>a</sup><br>(n = 839) |
| <b>Age at index, years</b>                 |                            |                           |                                        |                                     |                               |                                                     |
| Mean ± SD                                  | 66.1 ± 14.0                | 66.6 ± 13.6               | 68.1 ± 13.0                            | 67.9 ± 12.9                         | 66.6 ± 12.8                   | 64.9 ± 14.7                                         |
| Median (IQR)                               | 68 (59, 76)                | 68 (59, 76)               | 69 (60, 78)                            | 69 (59, 77)                         | 68 (59, 76)                   | 67 (57, 75)                                         |
| <b>Sex, n (%)</b>                          |                            |                           |                                        |                                     |                               |                                                     |
| Female                                     | 787 (40.0)                 | 189 (35.5)                | 252 (37.9)                             | 100 (34.0)                          | 546 (40.9)                    | 329 (39.2)                                          |
| Male                                       | 1181 (60.0)                | 343 (64.5)                | 413 (62.1)                             | 194 (66.0)                          | 788 (59.1)                    | 510 (60.8)                                          |
| <b>Race, n (%)</b>                         |                            |                           |                                        |                                     |                               |                                                     |
| Asian                                      | 65 (3.3)                   | 16 (3.0)                  | 10 (1.5)                               | 3 (1.0)                             | 47 (3.5)                      | 30 (3.6)                                            |
| Black or African American                  | 574 (29.2)                 | 156 (29.3)                | 197 (29.6)                             | 95 (32.3)                           | 413 (31.0)                    | 260 (31.0)                                          |
| Other                                      | 10 (0.5)                   | 2 (0.4)                   | 3 (0.5)                                | 2 (0.7)                             | 10 (0.7)                      | 5 (0.6)                                             |
| Unknown                                    | 118 (6.0)                  | 28 (5.3)                  | 36 (5.4)                               | 19 (6.5)                            | 81 (6.1)                      | 64 (7.6)                                            |
| White                                      | 1201 (61.0)                | 330 (62.0)                | 419 (63.0)                             | 175 (59.5)                          | 783 (58.7)                    | 480 (57.2)                                          |
| <b>Ethnicity, n (%)</b>                    |                            |                           |                                        |                                     |                               |                                                     |
| Hispanic or Latino                         | 77 (3.9)                   | 22 (4.1)                  | 29 (4.4)                               | 18 (6.1)                            | 62 (4.6)                      | 35 (4.2)                                            |
| Not Hispanic or Latino                     | 1783 (90.6)                | 482 (90.6)                | 609 (91.6)                             | 265 (90.1)                          | 1193 (89.4)                   | 765 (91.2)                                          |
| Unknown                                    | 108 (5.5)                  | 28 (5.3)                  | 27 (4.1)                               | 11 (3.7)                            | 79 (5.9)                      | 39 (4.6)                                            |
| <b>US Census region, n (%)</b>             |                            |                           |                                        |                                     |                               |                                                     |
| Midwest                                    | 66 (3.4)                   | 21 (3.9)                  | 16 (2.4)                               | 12 (4.1)                            | 62 (4.6)                      | 23 (2.7)                                            |
| Northeast                                  | 1756 (89.2)                | 477 (89.7)                | 605 (91.0)                             | 265 (90.1)                          | 1161 (87.0)                   | 755 (90.0)                                          |
| South                                      | 120 (6.1)                  | 27 (5.1)                  | 34 (5.1)                               | 12 (4.1)                            | 90 (6.7)                      | 50 (6.0)                                            |
| West                                       | 26 (1.3)                   | 7 (1.3)                   | 10 (1.5)                               | 5 (1.7)                             | 21 (1.6)                      | 11 (1.3)                                            |
| <b>Serum K<sup>+</sup> (mmol/L), n (%)</b> |                            |                           |                                        |                                     |                               |                                                     |
| Mean ± SD                                  | 5.5 ± 0.5                  | 5.5 ± 0.5                 | 5.5 ± 0.6                              | 5.5 ± 0.6                           | 5.5 ± 0.5                     | 5.9 ± 0.6                                           |
| Median (IQR)                               | 5.4 (5.2, 5.7)             | 5.4 (5.2, 5.7)            | 5.3 (5.2, 5.6)                         | 5.4 (5.2, 5.6)                      | 5.4 (5.2, 5.7)                | 5.7 (5.6, 6.0)                                      |
| >5.0 to < 5.5 (mild HK)                    | 1156 (58.7)                | 314 (59.0)                | 400 (60.2)                             | 179 (60.9)                          | 794 (59.5)                    | 0 (0.0)                                             |
| 5.5 to < 6.0 (moderate HK)                 | 559 (28.4)                 | 157 (29.5)                | 182 (27.4)                             | 81 (27.6)                           | 372 (27.9)                    | 580 (69.1)                                          |

|                                                            |                   |                   |                   |                   |                   |                   |
|------------------------------------------------------------|-------------------|-------------------|-------------------|-------------------|-------------------|-------------------|
| 6.0 to < 6.5 (severe HK)                                   | 166 (8.4)         | 37 (7.0)          | 51 (7.7)          | 19 (6.5)          | 109 (8.2)         | 170 (20.3)        |
| ≥6.5 (very severe HK)                                      | 87 (4.4)          | 24 (4.5)          | 32 (4.8)          | 15 (5.1)          | 59 (4.4)          | 89 (10.6)         |
| <b>eGFR (mL/min/1.73 m<sup>2</sup>)<sup>a</sup>, n (%)</b> |                   |                   |                   |                   |                   |                   |
| Mean ± SD                                                  | 34.6 ± 12.8       | 51.8 ± 4.3        | 43.5 ± 8.4        | 51.6 ± 4.3        | 34.7 ± 12.9       | 34.4 ± 13.0       |
| Median (IQR)                                               | 33.4 (23.5, 45.5) | 51.5 (48.0, 55.6) | 43.2 (36.4, 50.2) | 51.0 (47.7, 55.6) | 33.8 (23.4, 45.6) | 33.0 (22.6, 45.6) |
| 15–29 (stage 4 CKD)                                        | 826 (42.0)        | 0 (0.0)           | 0 (0.0)           | 0 (0.0)           | 557 (41.8)        | 357 (42.6)        |
| 30–44 (stage 3b CKD)                                       | 628 (31.9)        | 0 (0.0)           | 371 (55.8)        | 0 (0.0)           | 430 (32.2)        | 264 (31.5)        |
| 45–59 (stage 3a CKD)                                       | 514 (26.1)        | 532 (100.0)       | 294 (44.2)        | 294 (100.0)       | 347 (26.0)        | 218 (26.0)        |
| <b>Comorbidities, n (%)</b>                                |                   |                   |                   |                   |                   |                   |
| CCI score, mean ± SD                                       | 9.40 ± 3.87       | 9.52 ± 3.83       | 10.48 ± 3.78      | 10.4 ± 3.58       | 10.4 ± 3.5        | 9.09 ± 3.91       |
| Hypertension                                               | 1968 (100.0)      | 514 (96.6)        | 649 (97.6)        | 290 (98.6)        | 1306 (97.9)       | 812 (96.8)        |
| HF                                                         | 1151 (58.5)       | 294 (55.3)        | 665 (100.0)       | 294 (100.0)       | 815 (61.1)        | 469 (55.9)        |
| Type 2 diabetes                                            | 1306 (66.4)       | 347 (65.2)        | 464 (69.8)        | 205 (69.7)        | 1334 (100.0)      | 540 (64.4)        |
| <b>Pharmacotherapy, n (%)</b>                              |                   |                   |                   |                   |                   |                   |
| RAASi                                                      | 881 (44.8)        | 258 (48.5)        | 340 (51.1)        | 165 (56.1)        | 642 (48.1)        | 351 (41.8)        |
| MRA                                                        | 262 (13.3)        | 80 (15.0)         | 139 (20.9)        | 63 (21.4)         | 189 (14.2)        | 109 (13.0)        |
| ACEI                                                       | 475 (24.1)        | 134 (25.2)        | 167 (25.1)        | 81 (27.6)         | 365 (27.4)        | 192 (22.9)        |
| ARB                                                        | 460 (23.4)        | 138 (25.9)        | 200 (30.1)        | 97 (33.0)         | 319 (23.9)        | 179 (21.3)        |
| ARNI                                                       | 143 (7.3)         | 50 (9.4)          | 84 (12.6)         | 44 (15.0)         | 99 (7.4)          | 58 (6.9)          |
| Loop diuretic                                              | 1413 (71.8)       | 364 (68.4)        | 561 (84.4)        | 244 (83.0)        | 958 (71.8)        | 612 (72.9)        |
| Thiazide diuretic                                          | 507 (25.8)        | 119 (22.4)        | 187 (28.1)        | 76 (25.9)         | 352 (26.4)        | 217 (25.9)        |
| <b>HRU within 12 months pre-index, n (%)</b>               |                   |                   |                   |                   |                   |                   |
| Outpatient healthcare visit                                | 1920 (97.6)       | 518 (97.4)        | 650 (97.7)        | 288 (98.0)        | 1293 (96.9)       | 818 (97.5)        |
| ED visit                                                   | 509 (25.9)        | 141 (26.5)        | 202 (30.4)        | 89 (30.3)         | 385 (28.9)        | 208 (24.8)        |
| Inpatient hospitalization                                  | 1713 (87.0)       | 451 (84.8)        | 596 (89.6)        | 264 (89.8)        | 1135 (85.1)       | 743 (88.6)        |

<sup>a</sup>Serum K<sup>+</sup> ≥5.5 mmol/L for the index HK episode.

<sup>b</sup>Based on the last serum creatinine measured pre-index and calculated using the Mayo Clinic quadratic equation.

*ACEI* angiotensin-converting enzyme inhibitor, *ARB* angiotensin II receptor blocker, *ARNI* angiotensin receptor-neprilysin inhibitor, *CCI* Charlson Comorbidity Index, *CKD* chronic kidney disease, *ED* emergency department, *eGFR* estimated glomerular filtration rate, *HF* heart failure, *HK* hyperkalemia, *HRU* healthcare resource utilization, *IQR* interquartile range, *K<sup>+</sup>* potassium, *MRA* mineralocorticoid receptor antagonist, *RAASi* renin-angiotensin-aldosterone system inhibitor, *SD* standard deviation, *US* United States.

**Supplementary Table S4** Hyperkalemia recurrence and healthcare resource utilization following medical nutrition therapy in additional patient subgroups

|                                                                                    | Patient subgroup                   |                                   |                                       |                                                           |                                                        |                                                             |
|------------------------------------------------------------------------------------|------------------------------------|-----------------------------------|---------------------------------------|-----------------------------------------------------------|--------------------------------------------------------|-------------------------------------------------------------|
|                                                                                    | Hypertension<br>( <i>n</i> = 1968) | Stage 3a CKD<br>( <i>n</i> = 532) | Type 2 diabetes<br>( <i>n</i> = 1334) | Heart failure and<br>stage 3a/3b CKD<br>( <i>n</i> = 665) | Heart failure and<br>stage 3a CKD<br>( <i>n</i> = 294) | Moderate-to-<br>severe HK <sup>a</sup><br>( <i>n</i> = 839) |
| <b>Patients with ≥6 months<br/>of follow-up</b>                                    | 1444                               | 417                               | 978                                   | 496                                                       | 236                                                    | 628                                                         |
| <b>HK recurrence by analysis interval<sup>b</sup>, <i>n</i> (%)</b>                |                                    |                                   |                                       |                                                           |                                                        |                                                             |
| 0–1 month                                                                          | 642/1722 (37.3)                    | 160/485 (33.0)                    | 430/1171 (36.7)                       | 224/596 (37.6)                                            | 90/271 (33.2)                                          | 286/738 (38.8)                                              |
| 0–2 months                                                                         | 726/1661 (43.7)                    | 188/470 (40.0)                    | 484/1130 (42.8)                       | 244/569 (42.9)                                            | 104/258 (40.3)                                         | 327/716 (45.7)                                              |
| 0–3 months                                                                         | 766/1608 (47.6)                    | 202/456 (44.3)                    | 516/1100 (46.9)                       | 253/549 (46.1)                                            | 111/251 (44.2)                                         | 332/691 (48.0)                                              |
| 0–4 months                                                                         | 798/1561 (51.1)                    | 217/443 (49.0)                    | 538/1067 (50.4)                       | 266/530 (50.2)                                            | 123/247 (49.8)                                         | 350/675 (51.9)                                              |
| 0–5 months                                                                         | 807/1500 (53.8)                    | 219/431 (50.8)                    | 545/1021 (53.4)                       | 268/517 (51.8)                                            | 124/242 (51.2)                                         | 354/648 (54.6)                                              |
| 0–6 months                                                                         | 810/1444 (56.1)                    | 221/417 (53.0)                    | 549/978 (56.1)                        | 266/496 (53.6)                                            | 124/236 (52.5)                                         | 359/628 (57.2)                                              |
| <b>Number of HK recurrences<sup>c</sup>, <i>n</i> (%)</b>                          |                                    |                                   |                                       |                                                           |                                                        |                                                             |
| 0                                                                                  | 634 (43.9)                         | 196 (47.0)                        | 429 (43.9)                            | 230 (46.4)                                                | 112 (47.5)                                             | 269 (42.8)                                                  |
| 1                                                                                  | 341 (23.6)                         | 107 (25.7)                        | 237 (24.2)                            | 119 (24.0)                                                | 63 (26.7)                                              | 162 (25.8)                                                  |
| 2                                                                                  | 191 (13.2)                         | 47 (11.3)                         | 117 (12.0)                            | 50 (10.1)                                                 | 22 (9.3)                                               | 81 (12.9)                                                   |
| 3                                                                                  | 85 (5.9)                           | 19 (4.6)                          | 61 (6.2)                              | 35 (7.1)                                                  | 14 (5.9)                                               | 30 (4.8)                                                    |
| 4                                                                                  | 78 (5.4)                           | 19 (4.6)                          | 56 (5.7)                              | 28 (5.6)                                                  | 10 (4.2)                                               | 35 (5.6)                                                    |
| 5                                                                                  | 47 (3.3)                           | 11 (2.6)                          | 34 (3.5)                              | 13 (2.6)                                                  | 5 (2.1)                                                | 15 (2.4)                                                    |
| ≥6                                                                                 | 68 (4.7)                           | 18 (4.3)                          | 44 (4.5)                              | 21 (4.2)                                                  | 10 (4.2)                                               | 36 (5.7)                                                    |
| <b>Change in serum K<sup>+</sup> from baseline to first HK recurrence (mmol/L)</b> |                                    |                                   |                                       |                                                           |                                                        |                                                             |
| Mean ± SD                                                                          | −0.1 ± 0.6                         | −0.1 ± 0.5                        | −0.1 ± 0.6                            | −0.1 ± 0.6                                                | −0.1 ± 0.6                                             | −0.5 ± 0.6                                                  |
| <b>Serum K<sup>+</sup> at recurrence (mmol/L)<sup>d</sup>, mean ± SD</b>           |                                    |                                   |                                       |                                                           |                                                        |                                                             |
| First                                                                              | 5.4 ± 0.4                          | 5.4 ± 0.3                         | 5.4 ± 0.4                             | 5.4 ± 0.4                                                 | 5.3 ± 0.3                                              | 5.4 ± 0.4                                                   |
| Second                                                                             | 5.4 ± 0.4                          | 5.3 ± 0.3                         | 5.4 ± 0.4                             | 5.3 ± 0.3                                                 | 5.3 ± 0.2                                              | 5.4 ± 0.4                                                   |
| Third                                                                              | 5.5 ± 0.5                          | 5.4 ± 0.4                         | 5.5 ± 0.6                             | 5.4 ± 0.4                                                 | 5.5 ± 0.4                                              | 5.6 ± 0.6                                                   |
| Fourth                                                                             | 5.5 ± 0.4                          | 5.4 ± 0.4                         | 5.4 ± 0.4                             | 5.5 ± 0.5                                                 | 5.4 ± 0.2                                              | 5.5 ± 0.4                                                   |
| Fifth                                                                              | 5.4 ± 0.3                          | 5.4 ± 0.3                         | 5.4 ± 0.4                             | 5.4 ± 0.3                                                 | 5.4 ± 0.3                                              | 5.4 ± 0.4                                                   |
| Sixth                                                                              | 5.4 ± 0.3                          | 5.4 ± 0.4                         | 5.4 ± 0.4                             | 5.4 ± 0.3                                                 | 5.5 ± 0.4                                              | 5.4 ± 0.4                                                   |

**Time to each HK recurrence (days)<sup>d</sup>, mean ± SD**

|                                          |            |            |            |            |            |            |
|------------------------------------------|------------|------------|------------|------------|------------|------------|
| First                                    | 45 ± 46    | 48 ± 47    | 48 ± 48    | 42 ± 44    | 45 ± 45    | 45 ± 47    |
| Second                                   | 35 ± 37    | 38 ± 37    | 34 ± 35    | 37 ± 39    | 38 ± 40    | 35 ± 35    |
| Third                                    | 29 ± 29    | 25 ± 24    | 30 ± 29    | 27 ± 27    | 25 ± 25    | 28 ± 25    |
| Fourth                                   | 27 ± 26    | 22 ± 19    | 30 ± 28    | 25 ± 22    | 24 ± 23    | 25 ± 24    |
| Fifth                                    | 24 ± 22    | 27 ± 29    | 27 ± 25    | 21 ± 23    | 21 ± 30    | 21 ± 21    |
| Sixth                                    | 20 ± 19    | 23 ± 27    | 19 ± 22    | 20 ± 25    | 24 ± 34    | 20 ± 21    |
| <b>HK-related HRU<sup>c</sup>, n (%)</b> |            |            |            |            |            |            |
| Hospitalization                          | 196 (13.6) | 45 (10.8)  | 141 (14.4) | 61 (12.3)  | 26 (11.0)  | 94 (15.0)  |
| ED visit                                 | 21 (1.5)   | 6 (1.4)    | 15 (1.5)   | 2 (0.4)    | 1 (0.4)    | 7 (1.1)    |
| <b>All-cause HRU<sup>c</sup>, n (%)</b>  |            |            |            |            |            |            |
| Hospitalization                          | 919 (63.6) | 256 (61.4) | 623 (63.7) | 340 (68.5) | 167 (70.8) | 398 (63.4) |
| ED visit                                 | 321 (22.2) | 83 (19.9)  | 228 (23.3) | 117 (23.6) | 42 (17.8)  | 140 (22.3) |
| Mortality <sup>e</sup>                   | 313 (15.9) | 67 (12.6)  | 199 (14.9) | 112 (16.8) | 41 (13.9)  | 130 (15.5) |

<sup>a</sup>Serum K<sup>+</sup> ≥5.5 mmol/L for the index HK episode.

<sup>b</sup>Analyses included patients who remained uncensored for the entire duration of each analysis interval.

<sup>c</sup>Analyses included patients with ≥6 months of follow-up.

<sup>d</sup>Analyses included patients with ≥6 months of follow-up and sufficient number of HK recurrences.

<sup>e</sup>Mortality analyses included all patients in each cohort without censoring.

*CKD* chronic kidney disease, *ED* emergency department, *HK* hyperkalemia, *HRU* healthcare resource utilization, *K*<sup>+</sup> potassium, *SD* standard deviation

**Supplementary Table S5** Hyperkalemia recurrence following medical nutrition therapy by analysis interval, sensitivity analysis with serum  $K^+ \geq 5.5$  mmol/L as the recurrence threshold

|                                                          | Analysis interval <sup>a</sup> |                 |                 |                 |                 |                 |
|----------------------------------------------------------|--------------------------------|-----------------|-----------------|-----------------|-----------------|-----------------|
|                                                          | 0–1 month                      | 0–2 months      | 0–3 months      | 0–4 months      | 0–5 months      | 0–6 months      |
| <b>HK recurrence in overall population, <i>n</i> (%)</b> |                                |                 |                 |                 |                 |                 |
|                                                          | 353/1790 (19.7)                | 432/1727 (25.0) | 458/1671 (27.4) | 478/1623 (29.5) | 494/1560 (31.7) | 502/1503 (33.4) |
| <b>HK recurrence in patient subgroups, <i>n</i> (%)</b>  |                                |                 |                 |                 |                 |                 |
| Stage 3b CKD                                             | 112/571 (19.6)                 | 135/549 (24.6)  | 145/530 (27.4)  | 151/512 (29.5)  | 157/494 (31.8)  | 161/472 (34.1)  |
| Stage 4 CKD                                              | 165/734 (22.5)                 | 205/708 (29.0)  | 215/685 (31.4)  | 221/668 (33.1)  | 228/635 (35.9)  | 230/614 (37.5)  |
| HF                                                       | 198/1036 (19.1)                | 254/996 (25.5)  | 271/964 (28.1)  | 282/930 (30.3)  | 293/895 (32.7)  | 295/861 (34.3)  |
| Baseline RAASi                                           | 147/794 (18.5)                 | 179/776 (23.1)  | 193/753 (25.6)  | 207/731 (28.3)  | 214/702 (30.5)  | 221/681 (32.5)  |
| Hypertension                                             | 336/1722 (19.5)                | 413/1661 (24.9) | 438/1608 (27.2) | 458/1561 (29.3) | 475/1500 (31.7) | 482/1444 (33.4) |
| Stage 3a CKD                                             | 76/485 (15.7)                  | 92/470 (19.6)   | 98/456 (21.5)   | 106/443 (23.9)  | 109/431 (25.3)  | 111/417 (26.6)  |
| Type 2 diabetes                                          | 234/1171 (20.0)                | 280/1130 (24.8) | 299/1100 (27.2) | 314/1067 (29.4) | 325/1021 (31.8) | 332/978 (33.9)  |
| HF and stage 3a/3b CKD                                   | 106/596 (17.8)                 | 133/569 (23.4)  | 142/549 (25.9)  | 150/530 (28.3)  | 156/517 (30.2)  | 157/496 (31.7)  |
| HF and stage 3a CKD                                      | 41/271 (15.1)                  | 52/258 (20.2)   | 53/251 (21.1)   | 60/247 (24.3)   | 63/242 (26.0)   | 64/236 (27.1)   |
| Moderate-to-severe HK <sup>b</sup>                       | 146/738 (19.8)                 | 187/716 (26.1)  | 195/691 (28.2)  | 205/675 (30.4)  | 212/648 (32.7)  | 215/628 (34.2)  |

<sup>a</sup>Analyses included patients who remained uncensored for the entire duration of each analysis interval.

<sup>b</sup>Serum  $K^+ \geq 5.5$  mmol/L for the index HK episode.

CKD chronic kidney disease, HF heart failure, HK hyperkalemia,  $K^+$  potassium, RAASi renin-angiotensin-aldosterone system inhibitor
